# Supplementary material for: Sustainable dyeing of silk using an acetylshikonin-based natural colourant from the lichenParmotrema perlatum
Source: Royal Society of Chemistry journal article supplement (doi:10.1039/d3gc03686c), 2023-12-19
Supplement: d3gc03686c1.pdf [file d3gc03686c1.pdf]

## Supporting Tables

**Supporting Table S1. ANOVA for yield of dye extracted from *P. perlatum***

| Source                        | Sum of Squares | Mean Square | df | F Value | p-value Prob>F |                 |
|-------------------------------|----------------|-------------|----|---------|----------------|-----------------|
| Model                         | 15.09          | 1.68        | 9  | 20.42   | 0.026          | Significant     |
| A-Time (min)                  | 3.43           | 3.43        | 1  | 41.20   | 0.013          |                 |
| B-Temperature (°C)            | 2.60           | 2.60        | 1  | 31.66   | 0.025          |                 |
| C-Solid to liquid ratio (w/v) | 0.12           | 0.12        | 1  | 1.46    | 0.2806         |                 |
| AB                            | 0.012          | 0.012       | 1  | 0.15    | 0.7168         |                 |
| AC                            | 0.056          | 0.056       | 1  | 6.85    | 0.0472         |                 |
| BC                            | 0.13           | 0.13        | 1  | 1.58    | 0.2645         |                 |
| A <sup>2</sup>                | 3.36           | 3.36        | 1  | 40.94   | 0.0014         |                 |
| B <sup>2</sup>                | 3.43           | 3.43        | 1  | 41.81   | 0.0013         |                 |
| C <sup>2</sup>                | 1.25           | 1.25        | 1  | 15.17   | 0.0115         |                 |
| Residual                      | 0.41           | 0.082       | 5  |         |                |                 |
| Lack of Fit                   | 0.39           | 0.13        | 3  | 10.61   | 0.0873         | Not significant |
| Pure error                    | 0.024          | 0.012       | 2  |         |                |                 |
| Core Total                    | 15.50          |             | 14 |         |                |                 |

**Supporting Table S2. Numerical optimization of processing variables for maximum dye extraction from *P. perlatum* with desirability as a function**

| Time (days) | Temperature (°C) | Sample: Liquor ratio (w/v) | Yield (%) | Desirability |
|-------------|------------------|----------------------------|-----------|--------------|
| 30          | 60               | 17.91                      | 4.15      | 0.972        |

**Supporting Table S3. ANOVA for K/S ratio based on Box-Behnken design for dyeing of silk with extract from *P. perlatum***

| <b>Source</b>  | <b>Sum of Squares</b>  | <b>Mean Square</b>     | <b>df</b> | <b>F-Value</b>         | <b>p-value Prob&gt;F</b> |                 |
|----------------|------------------------|------------------------|-----------|------------------------|--------------------------|-----------------|
| Model          | 1.63                   | 0.18                   | 9         | 66.28                  | 0.0001                   | Significant     |
| A-Temperature  | 0.37                   | 0.37                   | 1         | 137.04                 | <0.0001                  |                 |
| B-Duration     | 0.017                  | 0.017                  | 1         | 6.17                   | 0.0556                   |                 |
| C-pH           | 0.74                   | 0.74                   | 1         | 270.96                 | <0.0001                  |                 |
| AB             | 2.025x10 <sup>-5</sup> | 2.025x10 <sup>-5</sup> | 1         | 7.418x10 <sup>-3</sup> | 0.9347                   |                 |
| AC             | 0.038                  | 0.038                  | 1         | 13.86                  | 0.0137                   |                 |
| BC             | 0.018                  | 0.018                  | 1         | 6.78                   | 0.0481                   |                 |
| A <sup>2</sup> | 0.21                   | 0.21                   | 1         | 77.72                  | 0.0003                   |                 |
| B <sup>2</sup> | 1.001x10 <sup>-3</sup> | 1.001x10 <sup>-3</sup> | 1         | 0.37                   | 0.5713                   |                 |
| C <sup>2</sup> | 0.26                   | 0.26                   | 1         | 93.49                  | 0.0002                   |                 |
| Residual       | 0.014                  | 2.73x10 <sup>-3</sup>  | 5         |                        |                          |                 |
| Lack of Fit    | 0.014                  | 3.88x10 <sup>-3</sup>  | 4         | 34.57                  | 0.1268                   | Not significant |
| Pure error     | 9.8X10 <sup>-5</sup>   | 9.8x10 <sup>-5</sup>   | 1         |                        |                          |                 |
| Core total     | 1.64                   |                        | 14        |                        |                          |                 |

**Supporting Table S4. ANOVA for percent fixation based on Box-Behnken design for dyeing of silk with extract from *P. perlatum***

| <b>Source</b>  | <b>Sum of Squares</b> | <b>Mean Square</b> | <b>df</b> | <b>F-Value</b> | <b>p-value Prob&gt;F</b> |                 |
|----------------|-----------------------|--------------------|-----------|----------------|--------------------------|-----------------|
| Model          | 1260.80               | 140.09             | 9         | 20.06          | 0.0021                   | Significant     |
| A-Temperature  | 630.97                | 630.97             | 1         | 90.35          | 0.0002                   |                 |
| B-Duration     | 96.39                 | 96.39              | 1         | 13.80          | 0.0138                   |                 |
| C-pH           | 294.67                | 294.67             | 1         | 42.20          | 0.013                    |                 |
| AB             | 0.51                  | 0.51               | 1         | 0.073          | 0.7975                   |                 |
| AC             | 3.93                  | 3.93               | 1         | 0.56           | 0.4872                   |                 |
| BC             | 2.89                  | 2.89               | 1         | 0.41           | 0.5481                   |                 |
| A <sup>2</sup> | 23.26                 | 23.26              | 1         | 3.33           | 0.1276                   |                 |
| B <sup>2</sup> | 203.39                | 203.39             | 1         | 29.12          | 0.0030                   |                 |
| C <sup>2</sup> | 29.81                 | 29.81              | 1         | 4.27           | 0.0937                   |                 |
| Residual       | 34.92                 | 6.98               | 5         |                |                          |                 |
| Lack of Fit    | 30.40                 | 7.60               | 4         | 1.68           | 0.5161                   | Not significant |
| Pure error     | 4.51                  | 4.51               | 1         |                |                          |                 |
| Core Total     | 1295.71               |                    | 14        |                |                          |                 |

**Supporting Table S5. Numerical optimization of parameters for dyeing of silk with extraction from *P. perlatum* with desirability as a function**

| <b>Temperature (°C)</b> | <b>Duration (min)</b> | <b>pH</b> | <b>K/S</b> | <b>% Fixation</b> | <b>Desirability</b> |
|-------------------------|-----------------------|-----------|------------|-------------------|---------------------|
| 90                      | 60                    | 4.02      | 1.64       | 94.65%            | 0.990               |

## Supporting Figures

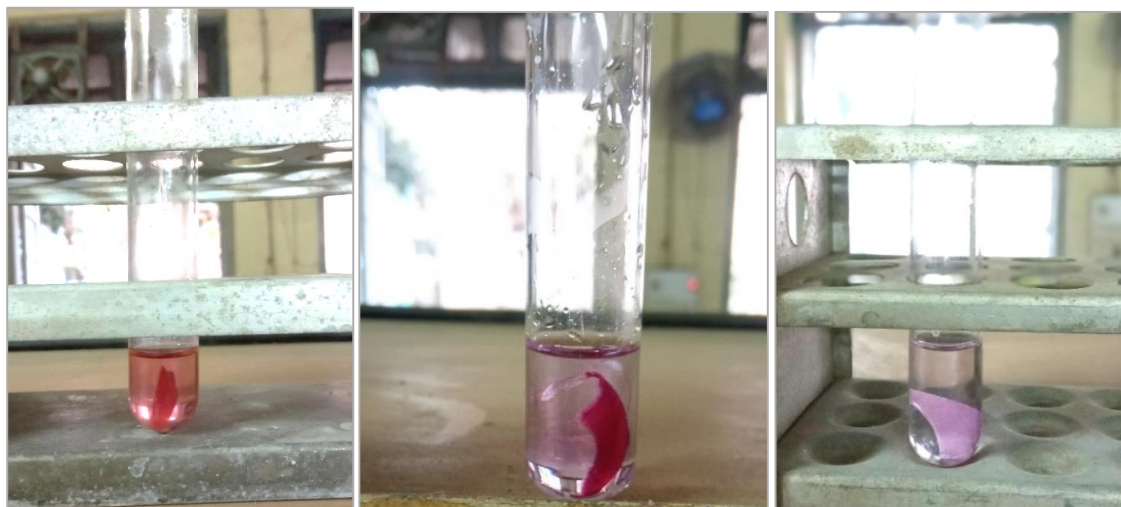

a)

b)

c)

**Supporting Figure S1: Silk fabric dyed with dyes extracted from *P. perlatum* in a) 50% acetic acid, b) 25% pyridine, c) DMF for verification of bonds between dye and the fibre**

| Compound Label         | Name           | <i>m/z</i> | RT    | Algorithm  | Mass    |
|------------------------|----------------|------------|-------|------------|---------|
| Cpd 42: Acetylshikonin | Acetylshikonin | 329.1066   | 9.683 | Auto MS/MS | 330.114 |

MS Spectrum

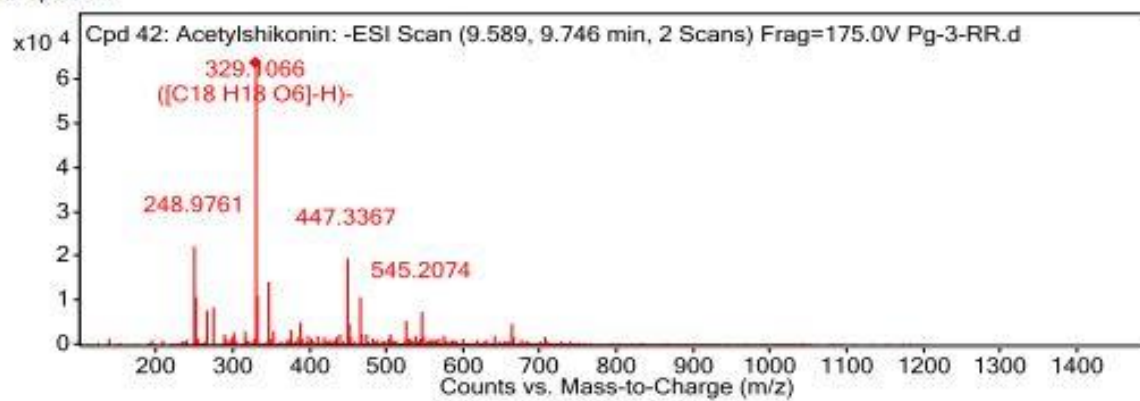

MS Zoomed Spectrum

a)

| Compound Label                      | Name                               | <i>m/z</i> | RT    | Algorithm  | Mass     |
|-------------------------------------|------------------------------------|------------|-------|------------|----------|
| Cpd 24: Nogalonic acid methyl ester | <b>Nogalonic acid methyl ester</b> | 419.071    | 6.772 | Auto MS/MS | 396.0818 |

MS Spectrum

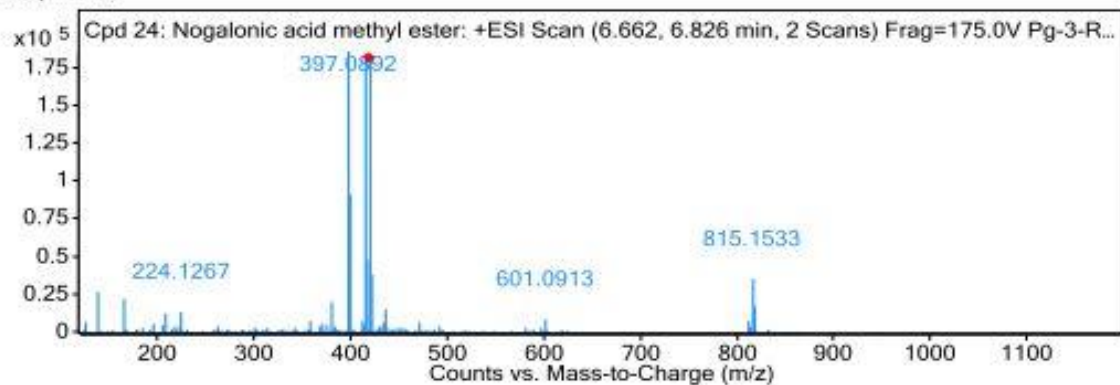

b)

| Compound Label      | Name               | <i>m/z</i> | RT    | Algorithm  | Mass     |
|---------------------|--------------------|------------|-------|------------|----------|
| Cpd 26: Isoathyriol | <b>Isoathyriol</b> | 273.0401   | 6.052 | Auto MS/MS | 274.0476 |

MS Spectrum

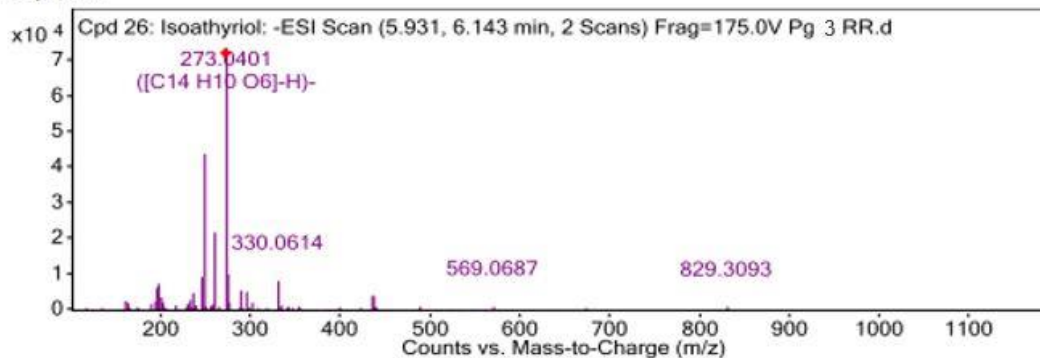

c)

**Supporting Figure S2: Mass spectrum of the dye extracted from *P. perlatum* showing presence of the chromophores a) acetylshikonin, b) nogalonic acid methyl ester and, c) isoathyriol**
